# Supplementary material
Source: Springer Nature journal article supplement (https://www.springermedizin.de/resource/supplementary/13256_2010_1377_MOESM3_ESM.pdf/9648850)

# 24-hour Urinary Excretion (nmol/24hr)

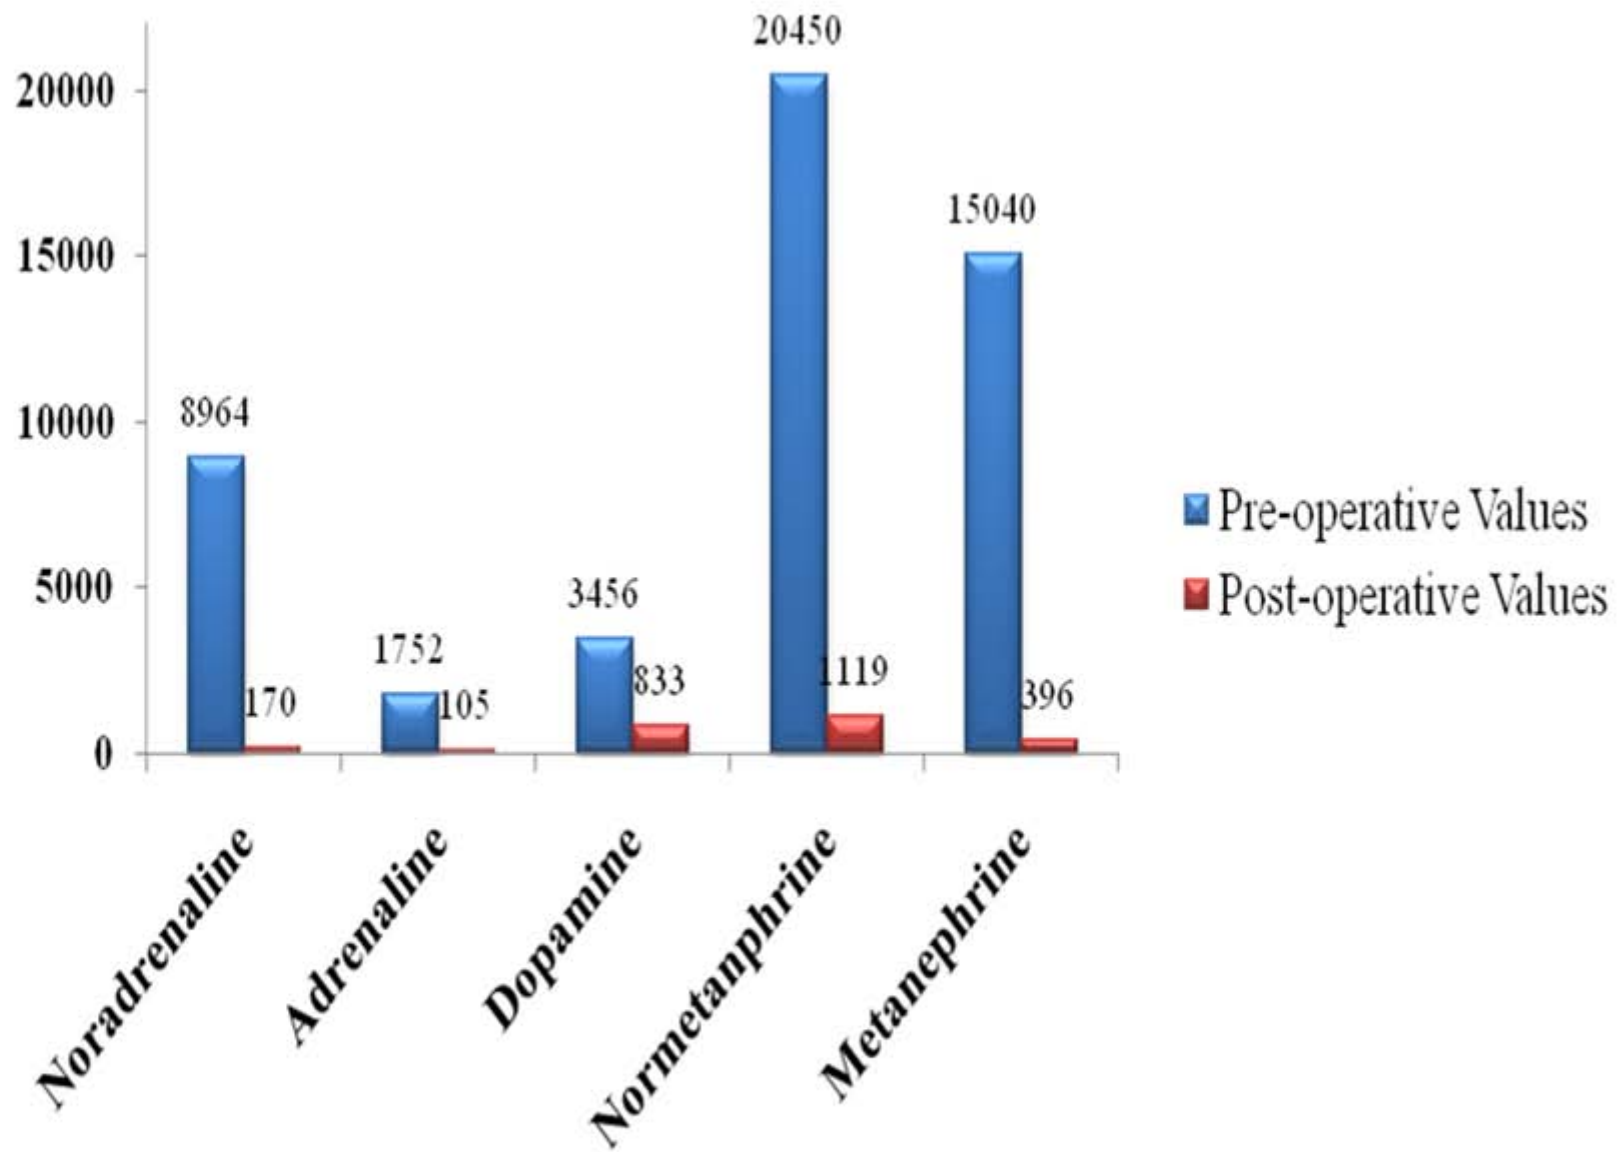

Supplement: MOESM3 [file 9648850]
